# Supplementary material
Source: HighWire-hosted journal article supplement (https://jme.bmj.com/highwire/filestream/152379/field_highwire_adjunct_files/0/jme-2022-108856supp001_data_supplement.pdf)
Supplement: jme-2022-108856supp001_data_supplement.pdf [file jme-2022-108856supp001_data_supplement.pdf]

## Appendix A: Bibliographical information of the consultation documents selected for the analysis

### Consultation no. 1 in 2009 (C1)

1. Helse- og omsorgsdepartementet. (2009). Høringsnotat om endring i forskrift om utgifter til poliklinisk legehjelp – endringer i regelverk for innsatsstyrt finansiering og mulighet for å utløse egenandeler [consultation paper].
2. Fornyings- og administrasjonsdepartementet. (2009). Høringsuttalelse vedr. utkast til høringsnotat om endringer i poliklinikkforskriften - endringer i regelverket for innsatsstyrt finansiering og mulighet for å utløse egenandeler [consultation response].
3. Funksjonshemmedes fellesorganisasjon. (2009). Høring - forslag om endring i forskrift om utgifter til poliklinisk legehjelp – endringer i regelverk for innsatsstyrt finansiering og mulighet for å utløse egenandeler [consultation response].
4. Fylkestannlegen i Hedmark. (2009). Svar - høring – forslag om endr.i forskrift [consultation response].
5. Fylkestannlegen i Vestfold. (2009). Høringsuttalelse til Forslag om endring i forskrift om utgifter til poliklinisk legehjelp - endringer i regelverk for innsatsstyrt finansiering og mulighet for å utløse egenandeler [consultation response].
6. Haraldsplass Diakonale Sykehus (HDS). (2009). Høringsresultat fra Haraldsplass Diakonale Sykehus (HDS) Høring – forslag om endring i forskrift om utgifter til poliklinisk legehjelp – endring i regelverk i forskrift for innsatsstyrt finansiering og mulighet for å utløse egenandel [consultation response].
7. Helse Nord RHF. (2009). Høringssvar – forslag om endring i forskrift om utgifter til poliklinisk legehjelp – endringer i regelverk for innsatsstyrt finansiering og muligheter for å utløse egenandeler [consultation response].
8. Helse Vest. (2009). Høringsnotat om endringer i poliklinikkforskriften - endringer i regelverket for innsatsstyrt finansiering og mulighet for å utløse egenandeler [consultation response].
9. Helsedirektoratet. (2009). Høring - forslag om endring i forskrift om utgifter til poliklinisk legehjelp - endringer i regelverk for innsatsstyrt finansiering og mulighet for å utløse egenandeler [consultation response].
10. Nordlandssykehuset. (2009). Høringssvar – forslag om endring i forskrift om utgifter til poliklinisk legehjelp - endring i regelverk for ISF og mulighet for å utløse egendeler [consultation response].
11. Norges Diabetesforbund (NDF). (2009). Høringssvar forslag om endring i forskrift om utgifter til polikliniske legehjelp - endring i regelverk for innsatsstyrt finansiering og mulighet til å utløse egendeler [consultation response].
12. Norsk Audiografforbund. (2009). Innspill til høring; Endring i forskrift om utgifter til poliklinisk legehjelp – endringer i regelverk for innsatsstyrt finansiering og mulighet for å utløse egenandeler [consultation response].

13. Norsk Fysioterapeutforbund (NFF). (2009). Høringssvar til forslag om endring i forskrift om utgifter til poliklinisk legehjelp endringer 1 regelverk for innsatsstyrt finansiering og mulighet for å utløse egenandeler [consultation response].

#### Consultation no. 2 in 2016 (C2)

1. Helse- og omsorgsdepartementet. (2016). Høyring. Framlegg til forskrift om betaling frå pasientar for poliklinisk helsehjelp i spesialisthelsetenesta [consultation paper].
2. Den norske legeförening. (2016). Høringssvar - Forskrift om betaling frå pasienter for poliklinisk helsehjelp i spesialisthelsetenesta [consultation response].
3. Fagrådet - Rusfeltets hovedorganisasjon. (2016). Høringssvar – forskrift om betaling fra pasienter for poliklinisk helsehjelp i spesialisthelsetjenesten [consultation response].
4. Fylkesmannen i Buskerud. (2016). Høringssvar fra Fylkesmannen i Buskerud [consultation response].
5. Gjøvik kommune. (2016). Forskrift – betaling fra pasienter for poliklinisk helsehjelp i spesialisthelsetjenester – administrativt høringssvar, Gjøvik kommune [consultation response].
6. Helse Nord RHF. (2016). Høringssvar fra Helse Nord RHF [consultation response].
7. Helse Sør-Øst RHF. (2016). Høringssvar fra Helse Sør-Øst RHF [consultation response].
8. Helse Vest RHF. (2016). Høyring - Forskrift om betaling frå pasientar for poliklinisk helsehjelp i spesialisthelsetenesta [consultation response].
9. Helsedirektoratet. (2016). Innspill til høring - Forskrift om betaling frå pasientar for poliklinisk helsehjelp i spesialisthelsetenesta [consultation response].
10. Nasjonal kompetansetjeneste for sjelden diagnoser (NKSD). (2016). Høringssvar fra Nasjonal kompetansetjeneste for sjelden diagnoser (NKSD) [consultation response].
11. Nettverk av brukerorganisasjonene på rusfeltet og Fagrådet -rusfeltets hovedorganisasjon. (2016). Høringssvar om: Forskrift om betaling fra pasienter for poliklinisk helsehjelp i spesialisthelsetjenesten [consultation response].
12. Norsk Sykepleierforbund. (2016). Høringssvar: VS: Høring - Forskrift om betaling frå pasienter for poliklinisk helsehjelp i spesialisthelsetenesta – høringssvar fra Norsk Sykepleierforbund [consultation response].
13. Norske ortoptisters forening (NOF). (2016). Høringssvar – Fremlegg til forskrift om betaling frå pasienter for poliklinisk helsehjelp i spesialisthelsetenesta [consultation response].
14. Oslo universitetssykehus HF. (2016). Angående høring: Fremlegg til forskrift om betaling fra pasienter for poliklinisk helsehjelp i spesialisthelsetjenesten [consultation response].
15. St. Olavs Hospital. (2016). Innspill fra St. Olavs Hospital til Høring - Forskrift om betaling frå pasienter for poliklinisk helsehjelp i spesialisthelsetjenesta Høringsfrist 1 oktober 2016 [consultation response].
16. Sykehuset Østfold HF. (2016). Høringsuttalelse [consultation response].

17. Universitetssykehuset Nord-Norge HF (UNN HF). (2016). Svar på Høring - Forskrift om betaling frå pasienter for poliklinisk helsehjelp i spesialisthelsetenesta [consultation response].
18. Vestre Viken. (2016). Høring - Forskrift om betaling frå pasienter for poliklinisk helsehjelp i spesialisthelsetenesta [consultation response].

#### Consultation no. 3 in 2019 (C3)

1. Helse- og omsorgsdepartementet. (2019). Høring om forslag til endringer i forskrift om betaling frå pasientar for poliklinisk helsehjelp i spesialisthelsetenesta [consultation paper].
2. Actis – Rusfeltets samarbeidsorgan. (2019). Høringssvar fra Actis - Rusfeltets samarbeidsorgan [consultation response].
3. Afasiforbundet i Norge. (2019). Høringssvar fra Afasiforbundet i Norge [consultation response].
4. Akershus universitetssykehus HF. (2019). Høring, endringer i forskrift om betaling fra pasienter fra poliklinisk helsehjelp i spesialisthelsetjenesten [consultation response].
5. Arbeidsutvalget i Faggruppe for FO-medlemmer i somatiske sykehus, Fellesorganisasjonen (FO). (2019). Høringssvar fra Arbeidsutvalget i Faggruppe for FO-medlemmer i somatiske sykehus, Fellesorganisasjonen (FO) [consultation response].
6. Astafjordlegen. (2019). Høringssvar fra Astafjordlegen [consultation response].
7. Avdeling for medisinsk genetikk, Haukeland Universitetssykehus. (2019). Høringssvar fra Avdeling for medisinsk genetikk, Haukeland Universitetssykehus [consultation response].
8. Den norske legeförening. (2019). Høring – Endringer i forskrift om betaling frå pasientar for poliklinisk helsehjelp i spesialisthelsetenesta [consultation response].
9. Diakonhjemmet Sykehus AS. (2019). Høringssvar fra Diakonhjemmet Sykehus AS. [consultation response].
10. Fylkeseldrerådet i Hordaland. (2019). Høringssvar - forslag til endringar i forskrift om betaling frå pasientar for poliklinisk helsehjelp i spesialisthelsetenesta. [consultation response].
11. Helse Fonna HF. (2019). Høringssvar fra Helse Fonna HF [consultation response].
12. Helse Førde. (2019). Høringssvar fra Helse Førde [consultation response].
13. Helse Møre og Romsdal HF. (2019). Høringssvar fra Helse Møre og Romsdal HF [consultation response].
14. Helse-Bergen-Haukeland Universitets Sykehus. (2019). Høringssvar fra Helse-Bergen- Haukeland Universitets Sykehus [consultation response].
15. Helsedirektoratet. (2019). Høringsinnspill- Endringer i forskrift om betaling fra pasienter for poliklinisk helsehjelp i spesialisthelsetjenester [consultation response].
16. Jernbanepensjonistenes Forening – Hamar. (2019). Høringssvar fra Jernbanepensjonistenes Forening – Hamar [consultation response].
17. Levanger kommune. (2019). Høringssvar fra Levanger kommune [consultation response].

18. Meland kommune. (2019). Høyringsuttale - Endring i forskrift om betaling fra pasientar for poliklinisk helsehjelp i spesialisthelsetenesta [consultation response].
19. Moss kommune. (2019). Høringssvar fra Moss kommune [consultation response].
20. Norsk Revmatikerforbund. (2019). Høringssvar til forslag om endringer i forskrift om betaling fra pasienter for poliklinisk helsehjelp [consultation response].
21. Pensjonistforbundet. (2019). Høring om endringer i forskrift om betaling fra pasienter for poliklinisk helsehjelp i spesialisthelsetjenesten [consultation response].
22. Sunnaas Sykehus HF. (2019). Høringssvar fra Sunnaas Sykehus HF [consultation response].
23. Sykehuset Østfold. (2019). Høyringsuttalelse [consultation response].
24. Velferdsalliansen EAPN Norway. (2019). Høringssvar fra Velferdsalliansen EAPN Norway angående forslag til endringer i forskrift om betaling fra pasienter for poliklinisk helsehjelp i spesialisthelsetjenesten [consultation response].

#### Consultation no. 4 in 2020 (C4)

1. Helse- og omsorgsdepartementet. (2020). Høyringsnotat. Forslag til endringer i forskrift om godtgjørelse for å yte poliklinisk helsehjelp i spesialisthelsetjenesten (poliklinikkforskriften) og forskrift om betaling fra pasientar for poliklinisk helsehjelp i spesialisthelsetenesta [consultation paper].
2. Akershus Universitetssykehus. (2020). Høringssvar fra Akershus Universitetssykehus [consultation response].
3. Arbeidsgiverforeningen Spekter. (2020). Høringssvar fra Arbeidsgiverforeningen Spekter [consultation response].
4. Bergen kommune. (2020). Høyringsuttalelse - endringer i forskrift om godtgjørelse for å yte poliklinisk helsehjelp i spesialisthelsetjenesten (poliklinikkforskriften) og forskrift om betaling fra pasienter for poliklinisk helsehjelp i spesialisthelsetjenesten [consultation response].
5. Blå Kors Norge. (2020). Høringssvar fra Blå Kors Norge [consultation response].
6. Haugesund Sanitetsforenings Revmatismesykehus. Høring – forslag til endringer i forskrift om godtgjørelse for å yte poliklinisk helsehjelp i spesialisthelsetjenesten (poliklinikkforskriften) [consultation response].
7. Helsedirektoratet. (2020). Innspill til høring - Forslag til endringer i forskrift om godtgjørelse for å yte poliklinisk helsehjelp i spesialisthelsetjenesten (poliklinikkforskriften) og forskrift om betaling fra pasientar for poliklinisk helsehjelp i spesialisthelsetenesta [consultation response].
8. Legeforeningen [Den norske legeforening]. (2020). Legeforeningens høringssvar - Forslag til endringer i forskrift om godtgjørelse for å yte poliklinisk helsehjelp i spesialisthelsetjenesten (poliklinikkforskriften) og forskrift om betaling fra pasientar for poliklinisk helsehjelp i spesialisthelsetenesta [consultation response].
9. Nasjonal kompetansetjeneste TSB. (2020). Høringssvar fra Nasjonal kompetansetjeneste TSB [consultation response].
10. Oslo kommune, Byrådsavdeling for helse, eldre og innbyggertjenester. (2020). Høringssvar fra Oslo kommune, Byrådsavdeling for helse, eldre og innbyggertjenester [consultation response].

11. Pensjonistforbundet. (2020). Forslag til endringer i forskrift om godtgjørelse for å yte poliklinisk helsehjelp i spesialisthelsetjenesten (poliklinikkforskriften) og forskrift om betaling fra pasientar for poliklinisk helsehjelp i spesialisthelsetenesta [consultation response].
12. Sunnaas sykehus HF. (2020). Høringssvar fra Sunnaas sykehus HF [consultation response].
13. Tjeldsund kommune. (2020). Høringssvar fra Tjeldsund kommune - postmottak@tjeldsund.kommune.no [consultation response].
14. Vestre Viken HF. (2020). Høringssvar vedr. forslag til endringer i forskrift om godtgjørelse for å yte poliklinisk helsehjelp i spesialisthelsetjenesten (poliklinikkforskriften) og forskrift om betaling fra pasientar for poliklinisk helsehjelp i spesialisthelsetenesta [consultation response].

#### Consultation no. 5 in 2021 (C5)

1. Helse- og omsorgsdepartementet. (2021). Høringsnotat. Forslag om å oppheve godkjenningsordningen for frittstående medisinske laboratorie- og røntgenvirksomheter og forslag om fraværsgbyr for private laboratorie- og røntgenvirksomheter som har avtale med regionalt helseforetak [consultation paper].
2. Den norske legeforening. (2021). Legeforeningens høringssvar - forslag om å oppheve godkjenningsordningen for frittstående medisinske laboratorie- og røntgenvirksomheter og om fraværsgbyr for private laboratorie- og røntgenvirksomheter som har avtale med regionalt helseforetak [consultation response].
3. Direktoratet for strålevern og atomsikkerhet. (2021). Høringssvar fra Direktoratet for strålevern og atomsikkerhet [consultation response].
4. Helse Bergen HF, Haukeland universitetssjukehus. (2021). Høringssvar fra Helse Bergen HF, Haukeland universitetssjukehus [consultation response].
5. Helse Sør-Øst RHF. (2021). Høringssvar - «Forslag om å oppheve godkjenningsordningen for frittstående medisinske laboratorie- og røntgenvirksomheter og om fraværsgbyr for private laboratorie- og røntgenvirksomheter som har avtale med regionalt helseforetak» [consultation response].
6. Helsedirektoratet. (2021). Svar på høring om å oppheve godkjenningsordningen for frittstående medisinske laboratorie- og røntgenvirksomheter og om fraværsgbyr [consultation response].
7. Landsforbundet for offentlige pensjonister. (2021). Høringssvar fra Landsforbundet for offentlige pensjonister [consultation response].
8. Oslo kommune. Høringssvar fra Oslo kommune [consultation response].
9. Pensjonistforbundet. (2021). Forslag til om å oppheve godkjenningsordningen for frittstående medisinske laboratorie- og røntgenvirksomheter og forslag om fraværsgbyr for private laboratorie- og røntgenvirksomheter som har avtale med regionalt helseforetak [consultation response].
10. Rådet for likestilling av mennesker med nedsatt funksjonsevne i Trøndelag. (2021). Høring - HOD - Forslag om å oppheve godkjenningsordningen for frittstående

- medisinske laboratorie- og røntgenvirksomheter og forslag om fraværsgеbyr for private laboratorie- og røntgenvirksomheter som har avtale med regionalt helseforetak [consultation response].
11. St. Olavs hospital HF. (2021). Høringssvar fra St. Olavs hospital HF [consultation response].
  12. Statens helsetilsyn. (2021). Høringssvar fra Statens helsetilsyn [consultation response].
  13. Sørlandet sykehus HF. (2021). Høringssvar fra Sørlandet sykehus HF [consultation response].
  14. Trøndelag fylkeskommune eldrerådet. (2021). Høring - HOD - Forslag om å oppheve godkjenningsordningen for frittstående medisinske laboratorie- og røntgenvirksomheter og forslag om fraværsgеbyr for private laboratorie- og røntgenvirksomheter som har avtale med regionalt helseforetak [consultation response].
  15. Vestre Viken HF. (2021). Høringssvar fra Vestre Viken HF [consultation response].
